# Supplementary material for: Gold Nanoparticles-Induced Modifications in Cell Wall Composition in Barley Roots
Source: MDPI journal article supplement (doi:10.3390/cells10081965), 2021-08-02
Supplement: s1 [file s1]

## Supplementary Materials

**Table S1.** Analysis of the distribution of the selected pectic epitopes in various tissues from the root DZ (based on cross-sections). 3 – epitope present in 100% of the cells, 2 – epitope > 50% of the cells, 1 – epitope < 50% of the cells, 0 – epitope not detected; the values are derived from three samples of each type of tissue. Due to difficulty in identifying the separate fluorescence signals in the cell wall and plasma membrane at the light microscopy level, these two compartments are described together as a signal in the wall; signals detected inside the cells were classified as being localized in the intracellular compartments or the cytoplasm: C—cytoplasm, W—cell wall. Green indicates the most pronounced changes in the treated roots compared to the control.

|      | Pectins     | Control | Neutral<br>5 nm | Neutral<br>20 nm | Positive<br>5 nm | Negative<br>5 nm |
|------|-------------|---------|-----------------|------------------|------------------|------------------|
| LM5  | Xylem       | 0       | 0               | 0                | 0                | 0                |
|      | Phloem      | 0       | 0               | 0                | 0                | 1 W              |
|      | Pericycle   | 0       | 0               | 0                | 0                | 0                |
|      | Endodermis  | 0       | 0               | 0                | 1 W              | 1 W              |
|      | Cortex      | 0       | 0               | 0                | 1 W              | 1 W              |
|      | Rhizodermis | 0       | 0               | 0                | 1 W              | 0                |
| LM6  | Xylem       | 0       | 0               | 0                | 0                | 0                |
|      | Phloem      | 2 C, W  | 2 C, W          | 2 C, W           | 2 C, W           | 1 C, W           |
|      | Pericycle   | 1 C, W  | 1 C, W          | 1 C, W           | 1 C, W           | 1 C, W           |
|      | Endodermis  | 1 C, W  | 1 C, W          | 1 C, W           | 1 C, W           | 1 C, W           |
|      | Cortex      | 1 C, W  | 1 C, W          | 1 C, W           | 1 C, W           | 1 C, W           |
|      | Rhizodermis | 2 C, W  | 2 C, W          | 2 C, W           | 2 C, W           | 1 C, W           |
| LM8  | Xylem       | 0       | 0               | 0                | 0                | 0                |
|      | Phloem      | 0       | 0               | 0                | 0                | 0                |
|      | Pericycle   | 0       | 0               | 0                | 0                | 0                |
|      | Endodermis  | 0       | 0               | 0                | 0                | 0                |
|      | Cortex      | 0       | 0               | 0                | 0                | 0                |
|      | Rhizodermis | 0       | 0               | 0                | 0                | 0                |
| JIM5 | Xylem       | 0       | 0               | 0                | 0                | 0                |
|      | Phloem      | 0       | 0               | 0                | 0                | 0                |
|      | Pericycle   | 0       | 0               | 0                | 0                | 0                |
|      | Endodermis  | 0       | 0               | 0                | 0                | 0                |
|      | Cortex      | 0       | 0               | 0                | 0                | 0                |
|      | Rhizodermis | 0       | 0               | 0                | 1 W              | 0                |
| JIM7 | Xylem       | 0       | 0               | 0                | 0                | 0                |
|      | Phloem      | 2 W     | 3 W             | 3 W              | 3 W              | 3 W              |
|      | Pericycle   | 1 W     | 1 W             | 1 W              | 1 W              | 1 W              |
|      | Endodermis  | 1 W     | 1 W             | 1 W              | 1 W              | 1 W              |
|      | Cortex      | 1 W     | 1 W             | 1 W              | 1 W              | 0                |
|      | Rhizodermis | 0       | 0               | 0                | 1 W              | 1 W              |

**Table S2.** Analysis of the distribution of the selected pectic epitopes in various tissues in the RA (based on longitudinal sections). 3 – epitope present in 100% of the cells, 2 – epitope > 50% of the cells, 1 – epitope < 50% of the cells, 0 – epitope not detected; the values are derived from three samples of each type of tissue. Due to difficulty in identifying the separate fluorescence signals in the cell wall and plasma membrane at the light microscopy level, these two compartments are described together as a signal in the wall; signals detected inside the cells were classified as being localized in the intracellular compartments or in the cytoplasm: C—cytoplasm, W—cell wall. Green indicates the most pronounced changes in the treated roots compared to the control.

|        | AGP         | Control | Neutral<br>5 nm | Neutral<br>20 nm | Positive<br>5 nm | Negative<br>5 nm |
|--------|-------------|---------|-----------------|------------------|------------------|------------------|
| JIM8   | Xylem       | 0       | 0               | 0                | 0                | 0                |
|        | Phloem      | 1 W     | 1 W             | 1 W              | 1 W              | 2 W              |
|        | Pericycle   | 0       | 0               | 0                | 0                | 0                |
|        | Endodermis  | 0       | 0               | 0                | 0                | 0                |
|        | Cortex      | 0       | 1 C, W          | 0                | 1 W              | 1 C, W           |
|        | Rhizodermis | 0       | 2 C, W          | 0                | 1 W              | 1 W              |
| JIM13  | Xylem       | 0       | 0               | 0                | 0                | 0                |
|        | Phloem      | 1 W     | 1 W             | 1 W              | 2 W              | 2 W              |
|        | Pericycle   | 0       | 0               | 0                | 1 C              | 0                |
|        | Endodermis  | 0       | 0               | 0                | 1 C, W           | 1 C, W           |
|        | Cortex      | 1 C, W  | 1 C, W          | 1 W              | 1 W              | 1 C, W           |
|        | Rhizodermis | 3 C, W  | 3 C, W          | 3 W              | 3 W              | 3 C, W           |
| JIM16  | Xylem       | 0       | 0               | 0                | 0                | 0                |
|        | Phloem      | 0       | 0               | 0                | 0                | 1 C              |
|        | Pericycle   | 0       | 0               | 0                | 0                | 1 C              |
|        | Endodermis  | 0       | 0               | 0                | 1 C              | 1 C, W           |
|        | Cortex      | 0       | 0               | 0                | 0                | 1 C              |
|        | Rhizodermis | 0       | 1 W             | 0                | 1 C, W           | 0                |
| MAC207 | Xylem       | 0       | 0               | 0                | 0                | 0                |
|        | Phloem      | 0       | 0               | 0                | 1 C              | 1 C              |
|        | Pericycle   | 0       | 0               | 0                | 0                | 1 C              |
|        | Endodermis  | 0       | 0               | 0                | 0                | 0                |
|        | Cortex      | 0       | 0               | 0                | 0                | 1 W              |
|        | Rhizodermis | 1 C, W  | 0               | 0                | 1 C, W           | 1 C, W           |
| LM2    | Xylem       | 0       | 0               | 0                | 0                | 0                |
|        | Phloem      | 1 C     | 1 C             | 1 C              | 0                | 1 C, W           |
|        | Pericycle   | 1 C     | 1 C             | 1 C              | 0                | 1 C              |
|        | Endodermis  | 1 C     | 1 C             | 1 C              | 0                | 1 C, W           |
|        | Cortex      | 0       | 0               | 0                | 0                | 1 W              |
|        | Hair        | 3 W, C  | 3 W, C          | 3 W, C           | 0                | 1 C, W           |
|        | Non-hair    | 1 W, C  | 1 W, C          | 1 W, C           | 3 C, W           | 0                |

**Table S3.** Analysis of the distribution of the selected AGP epitopes in various tissues of the root DZ (based on cross-sections). 3 – epitope present in 100% of the cells, 2 – epitope > 50% of the cells, 1 – epitope < 50% of the cells, 0 – epitope not detected; the values are derived from three samples of each type of tissue. Due to difficulty in identifying the separate fluorescence signals in the cell wall and plasma membrane at the light microscopy level, these two compartments are described together as a signal in the wall; signals detected inside the cells were classified as being localized in the intracellular compartments or in the cytoplasm: C—cytoplasm, W—cell wall. Green indicates the most pronounced changes in the treated roots compared to the control.

|      | Pectins     | Control | Neutral<br>5 nm | Neutral<br>20 nm | Positive<br>5 nm | Negative<br>5 nm |
|------|-------------|---------|-----------------|------------------|------------------|------------------|
| LM5  | Stele       | 1 W     | 1 W             | 1 W              | 1 W              | 1 W              |
|      | Cortex      | 3 W     | 3 W             | 3 W              | 0                | 1 W              |
|      | Rhizodermis | 1 W     | 1 W             | 1 W              | 0                | 1 W              |
|      | Root cap    | 1 W     | 1 W             | 1 W              | 1 W              | 1 W              |
| LM6  | Stele       | 1 C     | 1 C             | 1 C              | 1 C              | 1 C              |
|      | Cortex      | 1 C     | 0               | 0                | 1 C              | 1 C              |
|      | Rhizodermis | 1 W     | 1 W             | 1 W              | 2 C, W           | 1 C, W           |
|      | Root cap    | 1 C, W  | 1 W             | 2 C, W           | 2 C, W           | 1 C, W           |
| LM8  | Stele       | 0       | 0               | 0                | 0                | 0                |
|      | Cortex      | 0       | 0               | 0                | 0                | 0                |
|      | Rhizodermis | 0       | 0               | 0                | 0                | 0                |
|      | Root cap    | 2 C, W  | 0               | 0                | 2 C, W           | 1 C              |
| JIM5 | Stele       | 0       | 0               | 0                | 0                | 0                |
|      | Cortex      | 0       | 0               | 0                | 0                | 0                |
|      | Rhizodermis | 0       | 0               | 0                | 0                | 0                |
|      | Root cap    | 0       | 0               | 0                | 0                | 0                |
| JIM7 | Stele       | 1 W     | 2 W             | 1 W              | 2 W              | 1 C, W           |
|      | Cortex      | 2 W     | 2 W             | 2 W              | 2 W              | 2 W              |
|      | Rhizodermis | 0       | 0               | 0                | 0                | 0                |
|      | Root cap    | 1 W     | 1 W             | 1 W              | 1 W              | 0                |

**Table S4.** Analysis of the distribution of the selected AGP epitopes in various tissues in the RA (based on longitudinal sections). 3 – epitope present in 100% of the cells, 2 – epitope > 50% of the cells, 1 – epitope < 50% of the cells, 0 – epitope not detected; the values are derived from three samples of each type of tissue. Due to difficulty in identifying the separate fluorescence signals in the cell wall and plasma membrane at the light microscopy level, these two compartments are described together as a signal in the wall; signals detected inside the cells were classified as being localized in the intracellular compartments or in the cytoplasm: C—cytoplasm, W—cell wall. Green indicates the most pronounced changes in the treated roots compared to the control.

|        | AGP         | Control | Neutral<br>5 nm | Neutral<br>20 nm | Positive<br>5 nm | Negative<br>5 nm |
|--------|-------------|---------|-----------------|------------------|------------------|------------------|
| JIM8   | Stele       | 0       | 0               | 0                | 0                | 0                |
|        | Cortex      | 0       | 0               | 0                | 0                | 0                |
|        | Rhizodermis | 2 C, W  | 1 W             | 2 C, W           | 1 W              | 1 W              |
|        | Root cap    | 1 W     | 1 W             | 1 W              | 1 C, W           | 1 C              |
| JIM13  | Stele       | 0       | 0               | 0                | 0                | 1 C, W           |
|        | Cortex      | 1 C, W  | 1 C             | 0                | 0                | 1 C              |
|        | Rhizodermis | 3 C, W  | 1 C, W          | 1 C, W           | 1 C, W           | 1 C, W           |
|        | Root cap    | 2 W     | 1 W             | 2 W              | 1 W              | 1 W              |
| JIM16  | Stele       | 0       | 0               | 0                | 0                | 0                |
|        | Cortex      | 0       | 0               | 0                | 0                | 0                |
|        | Rhizodermis | 0       | 0               | 0                | 0                | 0                |
|        | Root cap    | 0       | 0               | 0                | 0                | 0                |
| MAC207 | Stele       | 0       | 0               | 0                | 0                | 0                |

|     |             |        |        |        |               |
|-----|-------------|--------|--------|--------|---------------|
|     |             |        |        |        |               |
| LM2 | Cortex      | 0      | 0      | 0      | 1 C           |
|     | Rhizodermis | 0      | 0      | 0      | 1 C, W        |
|     | Root cap    | 0      | 0      | 0      | 1 C 1 C       |
|     | Stele       | 1 C, W | 1 C, W | 1 C, W | 1 C, W 1 C, W |
|     | Cortex      | 1 W    | 0      | 1 C    | 0 0           |
|     | Rhizodermis | 2 W    | 0      | 0      | 0 0           |
|     | Root cap    | 1 C, W | 1 C, W | 1 C, W | 1 C, W 1 C, W |
